# Supplementary material
Source: PubMed Central journal article supplement (PMC6832839)
Supplement: NIHMS1536839-supplement-1.pdf [file NIHMS1536839-supplement-1.pdf]

Supplemental Table 1. Minimum detectable odds ratio to detect an association between *Mycoplasma genitalium* infection and MTCT of HIV, assuming alpha=0.05, power= 80%, and 2-sided test.

|                                   |     |     |     |     |     |     |
|-----------------------------------|-----|-----|-----|-----|-----|-----|
| # of infants infected perinatally | 65  | 65  | 65  | 65  | 65  | 65  |
| Antenatal prevalence <i>MG</i>    | 10% | 12% | 15% | 18% | 20% | 22% |
| True odds ratio                   | 2.9 | 2.8 | 2.6 | 2.5 | 2.5 | 2.4 |

*MG*= *Mycoplasma genitalium*; MTCT = mother-to-child transmission of HIV
